# Supplementary material for: The Role of ABA in the Interaction between Citrus Fruit and Penicillium digitatum
Source: MDPI journal article supplement (doi:10.3390/ijms232415796), 2022-12-13
Supplement: s1 [file s1]

Helen L. Warburton  
Marqués de Caro, 11-3<sup>a</sup>  
46003 VALENCIA

Tax. No. X0848511H  
Tel: +34 605 344 082  
Email: [hya@telefonica.net](mailto:hya@telefonica.net)

(English translations and corrections of English texts)

26 October 2022

Dear sir or madam,

I, Helen Warburton, native English writer, am registered in Inland Revenue's professional Epigraph 774 in the city of Valencia, since 28<sup>th</sup> October, 2003, as a translator and English language editor. I am also registered in several Spanish universities and Spanish research institutes to provide my translating and English language editing services. I am registered with the Spanish Data Protection Agency (AEPD). I currently work with the following research centres and firms in Spain:

UA, UCLM, ULPGC, UNIZAR, UJI, UMH, UMU, UNED, UPC, UPCT, UPV, UV, el Complejo Hospitalario de Albacete, IATA, IBMCP, IMDEA, INIA, IVI, IVIA, ASEPU, CIBER, CIPF, CEAM, ESPAITEC, FISABIO, FULP, SESCO, Fund. SECT, Fund. Hospital La Fe, Fund. Parc Científic UV, Univ. Federal do Recôncavo da Bahia, Univ. Federal de Viçosa, CEU San Pablo, Jabones Beltrán, Avanqua, etc.

I have recently checked and edited the article presented in English, written by María T. Lafuente and Luis González-Candelas, entitled:

**The role of ABA in the interaction between citrus fruit and  
*Penicillium digitatum***

Yours faithfully

Helen L. Warburton

**TRADUCCIONES - REVISIONES**  
**Helen Warburton**  
NIF: X08148511H  
Marqués de Caro, 11-3  
46003 - VALENCIA - 605 344 082

This document contains confidential information, whose content is protected by law. Anyone other than the addressee cannot reproduce, use or diffuse this complete or partial content. If you receive this by mistake, please notify the sender immediately for the necessary steps to be taken.
